# Supplementary material for: Alternaria and Fusarium Fungi: Differences in Distribution and Spore Deposition in a Topographically Heterogeneous Wheat Field
Source: MDPI journal article supplement (doi:10.3390/jof4020063), 2018-05-24
Supplement: s1 [file s1]

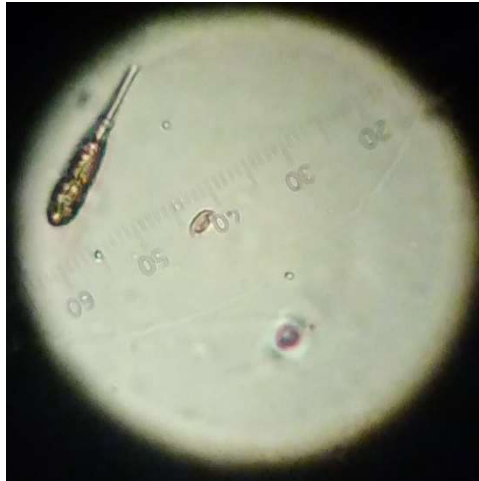

(a)

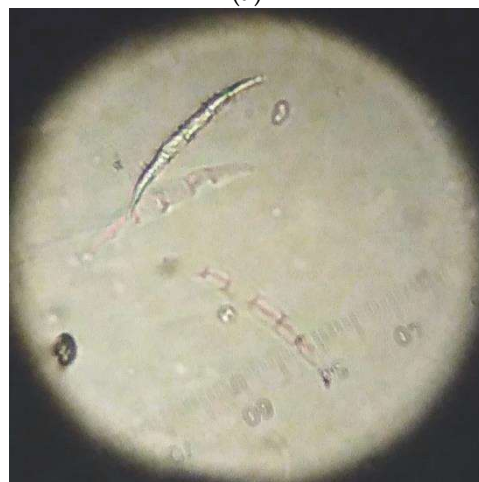

(b)

**Figure S1.** *Alternaria* spore (a) and *Fusarium* pores (b) observed and counted on the microscope slides.
